# Supplementary material for: Evaluation of the implementation of a whole-workplace walking programme using the RE-AIM framework
Source: Springer Nature journal article supplement (doi:10.1186/s12889-017-4376-7), 2017-05-18
Supplement: MOESM1 [file 12297702]

## Additional File 1 Walking Works programme: menu of options for activities

### Short-term promotions:

|                     |                                                                                                                                                                                                                                                                                                                                                                                                                                                                                                                                                                               |
|---------------------|-------------------------------------------------------------------------------------------------------------------------------------------------------------------------------------------------------------------------------------------------------------------------------------------------------------------------------------------------------------------------------------------------------------------------------------------------------------------------------------------------------------------------------------------------------------------------------|
| General publicity   | <ul style="list-style-type: none"> <li>• Hold a launch event to publicise Walking Works</li> <li>• Send out regular e-communications to staff regarding walking and activity opportunities</li> <li>• Interview staff walkers for intranets, websites, annual reports, newsletters, etc.</li> </ul>                                                                                                                                                                                                                                                                           |
| All walking         | <ul style="list-style-type: none"> <li>• Encourage employees to make a pledge on the Walking Works website in return for hints and tips to support walking via email</li> <li>• Organise a 'walk doctor' session for staff (a consultation with a walking specialist to discuss walking habits, barriers to walking and identify solutions to encourage walking)</li> <li>• Publicise charity walks and encourage staff to take part</li> <li>• Link walking promotions to other promotions e.g. hold a Fairtrade breakfast for walkers during Fairtrade fortnight</li> </ul> |
| Walking to work     | <ul style="list-style-type: none"> <li>• Take part in National Walk to Work Week</li> <li>• Create an online chat with local transport experts (opportunity to raise concerns about routes)</li> </ul>                                                                                                                                                                                                                                                                                                                                                                        |
| Walking during work | <ul style="list-style-type: none"> <li>• Organise lunchtime walks and talks (with an expert, person of interest?)</li> <li>• Set up 'walk and talk with the Chief Executive' opportunities</li> </ul>                                                                                                                                                                                                                                                                                                                                                                         |
| Other               | <ul style="list-style-type: none"> <li>• Art attacks (e.g. turn a few car park spaces into chill out gardens)</li> </ul>                                                                                                                                                                                                                                                                                                                                                                                                                                                      |

### Incentives and rewards:

|                 |                                                                                                                                                                                                                                                                                                                                                                                                              |
|-----------------|--------------------------------------------------------------------------------------------------------------------------------------------------------------------------------------------------------------------------------------------------------------------------------------------------------------------------------------------------------------------------------------------------------------|
| All walking     | <ul style="list-style-type: none"> <li>• Run a pedometer challenge (personal, team, departmental, organisational, inter-company)</li> <li>• Run a walking challenge (teams, departments, whole-workplace, inter-workplace)</li> <li>• Set up a fantasy football league</li> <li>• Run workplace walking competitions (e.g. photos, distance, treasure hunt)</li> </ul>                                       |
| Walking to work | <ul style="list-style-type: none"> <li>• Hold one off or regular walk to work breakfasts</li> <li>• Implement a 'walk once a week' incentive scheme</li> <li>• Hire a fitness instructor to lead a 'commute boot camp' where staff do higher-level fitness training on their walk to or from work</li> <li>• Set up deals with local businesses e.g. money off schemes for those who walk to work</li> </ul> |

### Long-term activities:

|                     |                                                                                                                                                                                                                                                                         |
|---------------------|-------------------------------------------------------------------------------------------------------------------------------------------------------------------------------------------------------------------------------------------------------------------------|
| All walking         | <ul style="list-style-type: none"> <li>• Display motivational posters within the workplace to promote walking</li> <li>• Set up a walking buddy / bring a friend scheme</li> <li>• Encourage employees to keep online walking diaries</li> </ul>                        |
| Walking to work     | <ul style="list-style-type: none"> <li>• Run walking buses on popular routes (to get people to public transport late at night)</li> </ul>                                                                                                                               |
| Walking during work | <ul style="list-style-type: none"> <li>• Organise lunch time walks, or other organised walks</li> <li>• Produce maps of the local area denoting points of interest within 5, 10, 15 and 30 minutes' walk</li> <li>• Encourage staff to hold walking meetings</li> </ul> |
| Other               | <ul style="list-style-type: none"> <li>• Organise a regular health check for employees, e.g. during Know Your Numbers Week</li> </ul>                                                                                                                                   |

**Policy development:**

|                 |                                                                                                                                                                                                                                                                                                                                                                                                                                                                                                           |
|-----------------|-----------------------------------------------------------------------------------------------------------------------------------------------------------------------------------------------------------------------------------------------------------------------------------------------------------------------------------------------------------------------------------------------------------------------------------------------------------------------------------------------------------|
| All walking     | <ul style="list-style-type: none"><li>• Develop a company policy on walking</li><li>• Introduce walking inductions for new recruits</li><li>• Encourage staff to set up a Walking Action Group (to campaign for improvements to routes around the site)</li><li>• Instigate a walkability audit that will make recommendations to senior staff</li><li>• Instigate an audit of your workplace policies from the points of view of encouraging walking, and make recommendations to senior staff</li></ul> |
| Walking to work | <ul style="list-style-type: none"><li>• Introduce a walking mileage</li></ul>                                                                                                                                                                                                                                                                                                                                                                                                                             |

**Environmental/structural changes:**

|                 |                                                                                                                                                                                                                                                                                                                                        |
|-----------------|----------------------------------------------------------------------------------------------------------------------------------------------------------------------------------------------------------------------------------------------------------------------------------------------------------------------------------------|
| All walking     | <ul style="list-style-type: none"><li>• Provide benches for walkers</li><li>• Install signage around the site which directs staff to popular walking routes</li></ul>                                                                                                                                                                  |
| Walking to work | <ul style="list-style-type: none"><li>• Install showers for commuters</li><li>• Provide lockers for bulky boots, brollies, etc.</li><li>• Ensure lighting around the workplace is adequate for those who leave or arrive late</li><li>• Introduce ‘crunchy’ pavements for late nights, so people can hear others approaching</li></ul> |
