# Supplementary material for: Evaluation of the implementation of a whole-workplace walking programme using the RE-AIM framework
Source: BMC Public Health. 2017 May 18;17:466. doi: 10.1186/s12889-017-4376-7 (PMC5437663; doi:10.1186/s12889-017-4376-7)
Supplement: Supplementary file 2 — Employee characteristics at baseline and follow-up (PDF 170 kb) [file 12889_2017_4376_MOESM2_ESM.pdf]

## Additional File 2 Employee characteristics at baseline and follow-up

**Table A1 Employee characteristics at baseline and follow-up**

| Characteristic                               | Baseline       |      | Follow-up      |      |              |
|----------------------------------------------|----------------|------|----------------|------|--------------|
|                                              | n=1544         |      | n=918          |      | <i>p</i>     |
|                                              | n <sup>a</sup> | %    | n <sup>a</sup> | %    |              |
| <b>Gender</b>                                |                |      |                |      |              |
| Female                                       | 932            | 68.3 | 526            | 65.6 | 0.189        |
| <b>Age (years)</b>                           |                |      |                |      |              |
| 16-30                                        | 436            | 34.2 | 247            | 31.3 | 0.251        |
| 31-44                                        | 491            | 38.5 | 331            | 42.0 |              |
| ≥45                                          | 348            | 27.3 | 210            | 26.6 |              |
| <b>Ethnicity</b>                             |                |      |                |      |              |
| White                                        | 1252           | 93.1 | 730            | 91.9 | 0.466        |
| <b>Highest educational qualification</b>     |                |      |                |      |              |
| University degree                            | 327            | 46.5 | 323            | 40.7 | 0.113        |
| Higher education/certificate                 | 143            | 10.6 | 89             | 11.2 |              |
| GCE 'A' Level                                | 272            | 20.2 | 192            | 24.2 |              |
| GCSE Grades A to C                           | 251            | 18.6 | 150            | 18.9 |              |
| No formal qualification                      | 18             | 1.3  | 15             | 1.9  |              |
| <b>Distance live from work</b>               |                |      |                |      |              |
| ≤2 miles                                     | 308            | 21.3 | 155            | 17.5 | <b>0.010</b> |
| 2.1-5 miles                                  | 413            | 28.6 | 249            | 28.1 |              |
| 5.1-10 miles                                 | 333            | 23.0 | 254            | 28.7 |              |
| >10 miles                                    | 391            | 27.1 | 227            | 25.6 |              |
| <b>Occupation</b>                            |                |      |                |      |              |
| Senior or Middle Manager                     | 232            | 16.9 | 150            | 18.5 | 0.079        |
| Professional occupation                      | 347            | 25.3 | 167            | 20.6 |              |
| Clerical                                     | 751            | 54.9 | 473            | 58.3 |              |
| Technical or manual                          | 39             | 2.8  | 21             | 2.6  |              |
| <b>Working hours</b>                         |                |      |                |      |              |
| Full-time                                    | 1051           | 76.9 | 637            | 78.8 | 0.305        |
| Part-time                                    | 315            | 23.1 | 171            | 21.2 |              |
| <b>Work-related physical activity</b>        |                |      |                |      |              |
| Sitting occupation                           | 1368           | 91.6 | 813            | 90.8 | 0.269        |
| <b>Physical activity levels</b>              |                |      |                |      |              |
| Meeting current recommendations <sup>b</sup> | 317            | 23.2 | 181            | 22.6 | 0.754        |

<sup>a</sup> Numbers do not sum up to total due to missing responses.

<sup>b</sup> Assessed using a single item measure of physical activity [21]
